# Supplementary material for: Dynamic actuation enhances transport and extends therapeutic lifespan in an implantable drug delivery platform
Source: PubMed Central journal article supplement (PMC9349266; doi:10.1038/s41467-022-32147-w), 2022-08-03
Supplement: 41467_2022_32147_MOESM1_ESM.pdf [file 41467_2022_32147_MOESM1_ESM.pdf]

# Dynamic actuation enhances transport and extends therapeutic lifespan in an implantable drug delivery platform

William Whyte <sup>1,†</sup>, Debkalpa Goswami <sup>1,†</sup>, Sophie X. Wang <sup>1,2,†</sup>, Yiling Fan <sup>3</sup>,  
Niamh A. Ward <sup>1,4</sup>, Ruth E. Levey <sup>5</sup>, Rachel Beatty <sup>5</sup>, Scott T. Robinson <sup>5,6</sup>, Declan Sheppard <sup>7</sup>,  
Raymond O'Connor <sup>5</sup>, David S. Monahan <sup>1,5</sup>, Lesley Trask <sup>4</sup>, Keegan L. Mendez <sup>8</sup>,  
Claudia E. Varela <sup>8</sup>, Markus A. Horvath <sup>8</sup>, Robert Wylie <sup>5</sup>, Joanne O'Dwyer <sup>1,4</sup>,  
Daniel A. Domingo-Lopez <sup>5</sup>, Arielle S. Rothman <sup>1</sup>, Garry P. Duffy <sup>5,6</sup>, Eimear B. Dolan <sup>4,\*</sup>,  
Ellen T. Roche <sup>1,3,8,\*</sup>

<sup>1</sup> Institute for Medical Engineering and Science, Massachusetts Institute of Technology, Cambridge, MA, USA.

<sup>2</sup> Department of Surgery, Beth Israel Deaconess Medical Center, Boston, MA, USA.

<sup>3</sup> Department of Mechanical Engineering, Massachusetts Institute of Technology, Cambridge, MA, USA.

<sup>4</sup> Department of Biomedical Engineering, National University of Ireland Galway, Galway, Ireland.

<sup>5</sup> Anatomy and Regenerative Medicine Institute (REMEDI), National University of Ireland Galway, Galway, Ireland.

<sup>6</sup> Advanced Materials and BioEngineering Research Centre (AMBER), Trinity College Dublin, Dublin, Ireland.

<sup>7</sup> Department of Radiology, University Hospital, Galway, Ireland.

<sup>8</sup> Harvard-MIT Program in Health Sciences and Technology, Cambridge, MA, USA.

† These authors contributed equally: William Whyte, Debkalpa Goswami, Sophie X. Wang

\* Corresponding author email: eimear.dolan@nuigalway.ie; etr@mit.edu

## Supplementary Figures

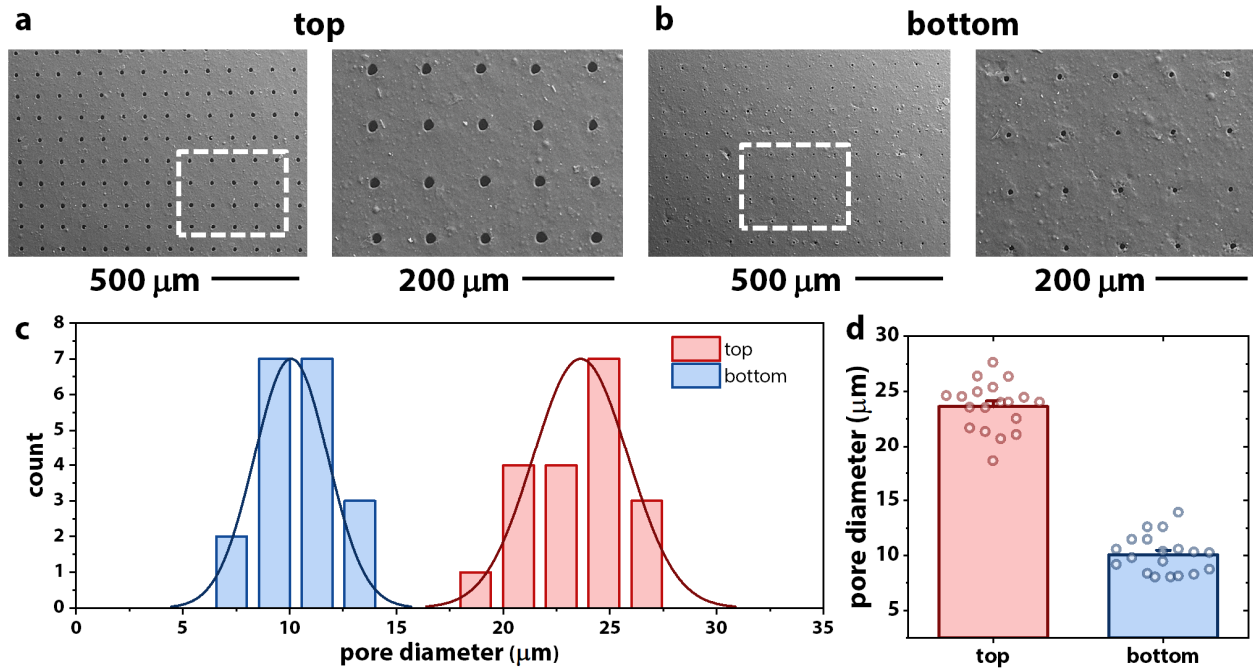

**Supplementary Fig. 1 | STAR porous membrane characterization.** Scanning electron micrographs of the laser cut TPU membrane from the **a**, top and **b**, bottom view. **c**, Pore size distribution at the top and bottom of the membrane. **d**, Average pore diameter at the top and bottom of the membrane.  $n = 19$  pores from single micrograph. Data are means  $\pm$  standard error of mean.

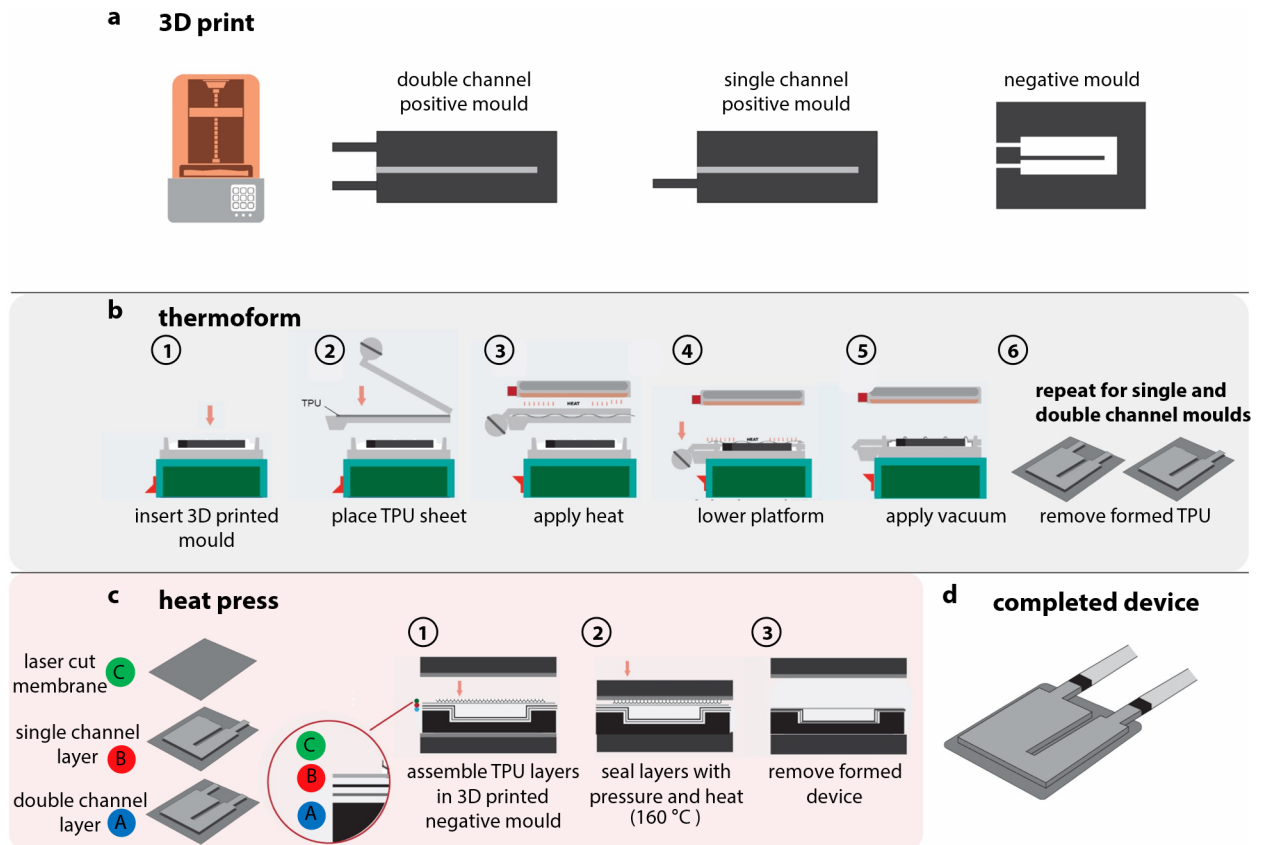

**Supplementary Fig. 2 | STAR Manufacturing Process.** **a**, 3D printing of positive and negative moulds. **b**, Thermoforming of double and single channel layers using printed positive moulds. **c**, Heat sealing of assembly consisting of double channel layer, single channel layer, and laser cut porous membrane. **d**, Completed STAR device.

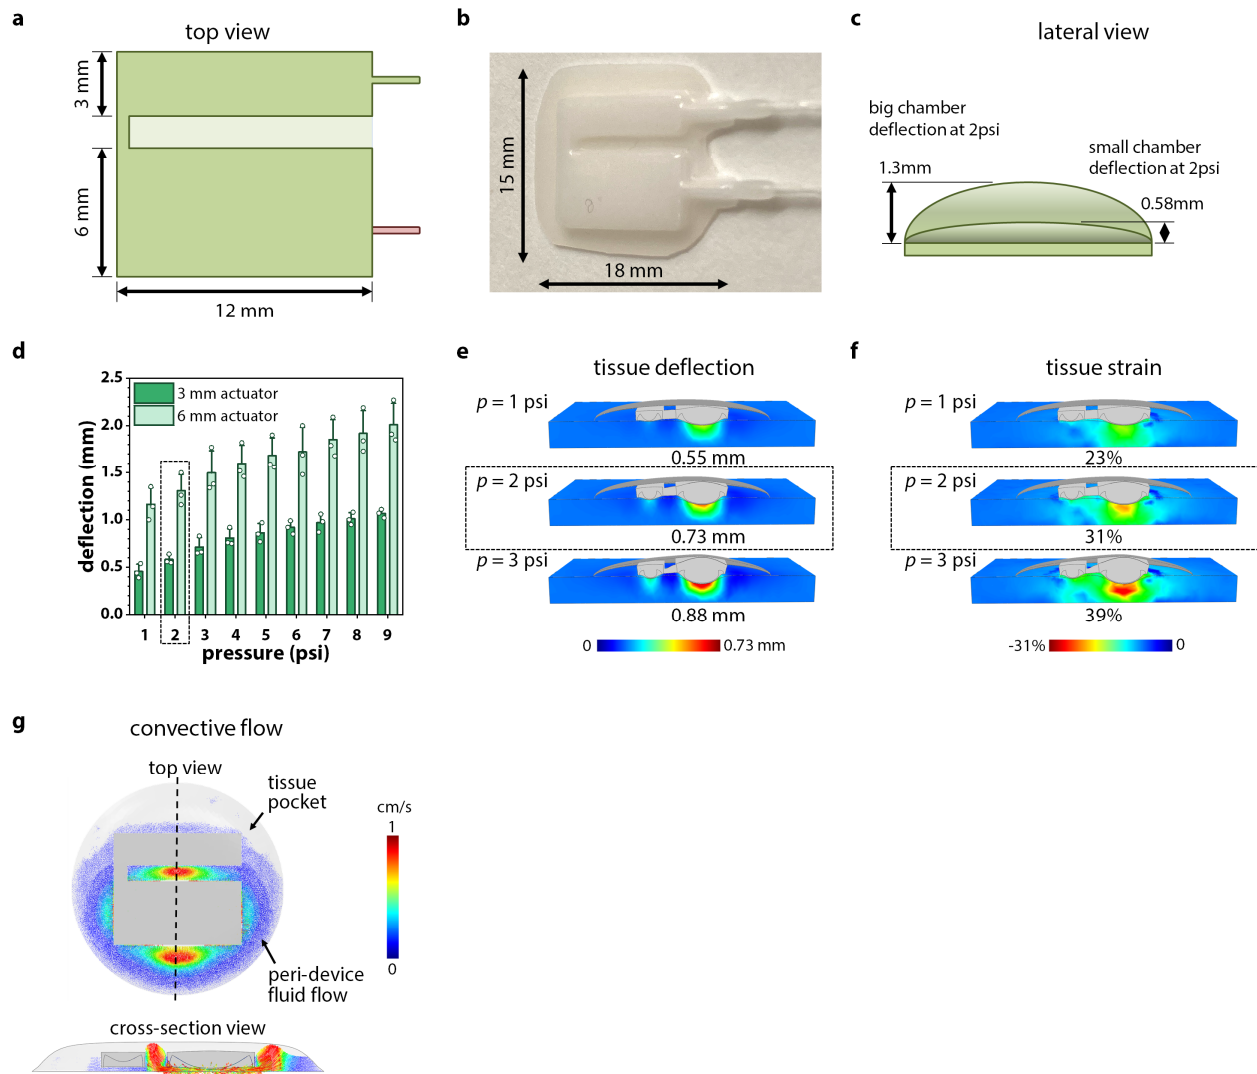

**Supplementary Fig. 3 | Membrane deflection in STAR.** **a**, Schematics of bi-chambered STAR device. Single pressure input allows for variable deflection in a single device. **b**, Prototype of bi-chambered STAR device manufactured by the process described in Supplementary Figure 2. **c**, Schematic depicting lateral view of bi-chambered device, and differential deflection height of each chamber upon uniform pressurization. **d**, Maximum membrane deflection for the 3 mm and 6 mm chambers during actuation with a 1–9 psi pressure input. Pressure of 2 psi was chosen for the preclinical experiments.  $n = 3$  bi-chambered devices at each actuation pressure. Data are means  $\pm$  standard error of mean. **e**, Finite element (FE) model showing tissue deflection caused by STAR membrane at 1, 2, and 3 psi pressure input. **f**, FE model showing tissue strain caused by STAR membrane at 1, 2, and 3 psi pressure input. **g**, FE model showing peri-implant fluid velocity of convective flow around the large and small chamber during actuation at 2 psi.

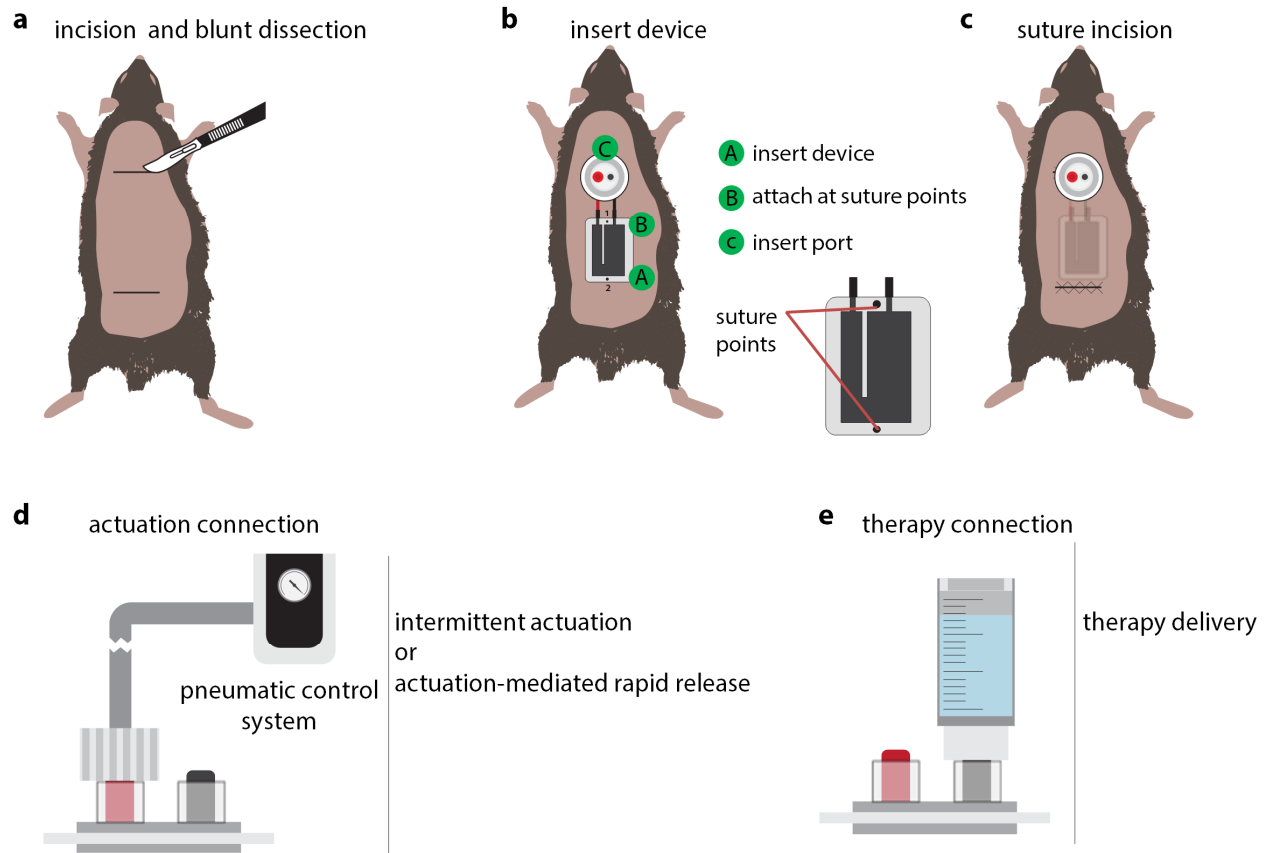

**Supplementary Fig. 4 | Overview of the STAR small animal surgical model. a,** Incision and blunt dissection. **b,** Insertion of the device, port, and attachment to the underlying fascia at designated suture points. **c,** Closing of the skin surgical incision with sutures. **d,** Connection of pneumatic control system to actuation port for delivery of intermittent actuation or actuation-mediated rapid release. **e,** Connection of drug filled syringe to therapy port for replenishable, targeted delivery to the STAR therapy reservoir.

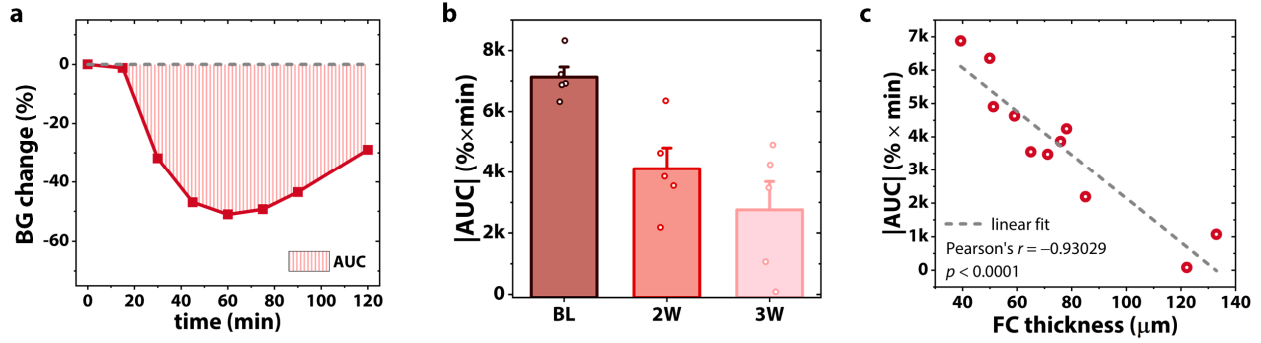

**Supplementary Fig. 5** | **a**, Area under the curve (AUC) calculated by integrating the area under the blood glucose (BG) % curve. **b**, Temporal evolution of AUC, calculated at baseline (BL; 3 days), 2 weeks (2W) and 8 weeks (8W). AUC decreases over time as the fibrous capsule (FC) grows.  $n = 5$  mice per timepoint. Data are means  $\pm$  standard error of mean. **c**, Relationship between FC thickness and AUC. Each data point is a measurement from a different mouse.  $p$ -value calculated from two-tailed  $t$ -test of significance of the correlation coefficient.

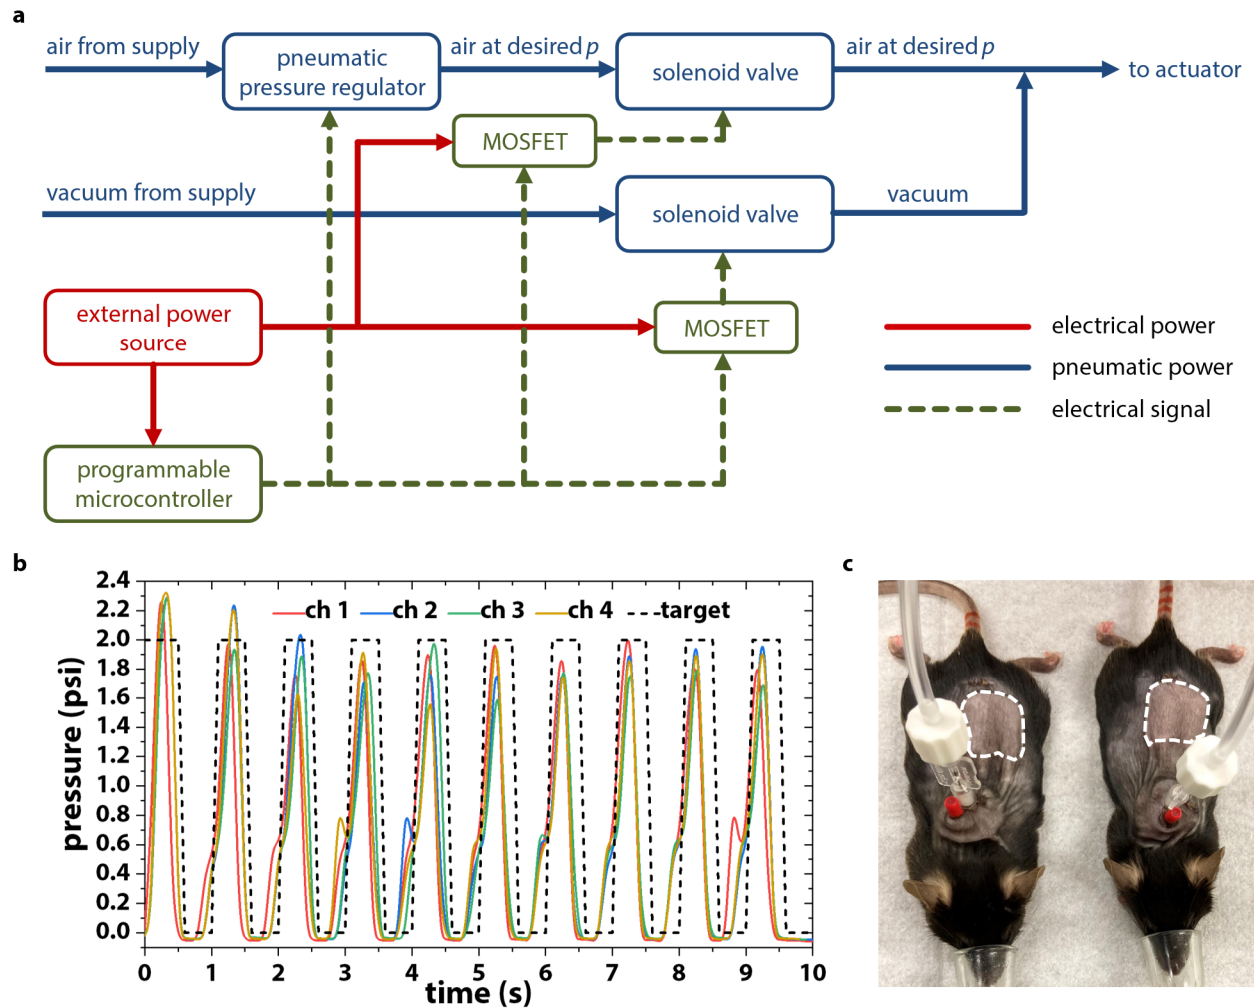

**Supplementary Fig. 6 | Development of an electropneumatic control system to actuate STAR. a,** Block diagram showing the components of the programmable electropneumatic control system used to actuate STAR. **b,** Actuation pressure profile measured by an in-line pressure sensor. **c,** Application of a dynamic actuation regimen *in vivo*.

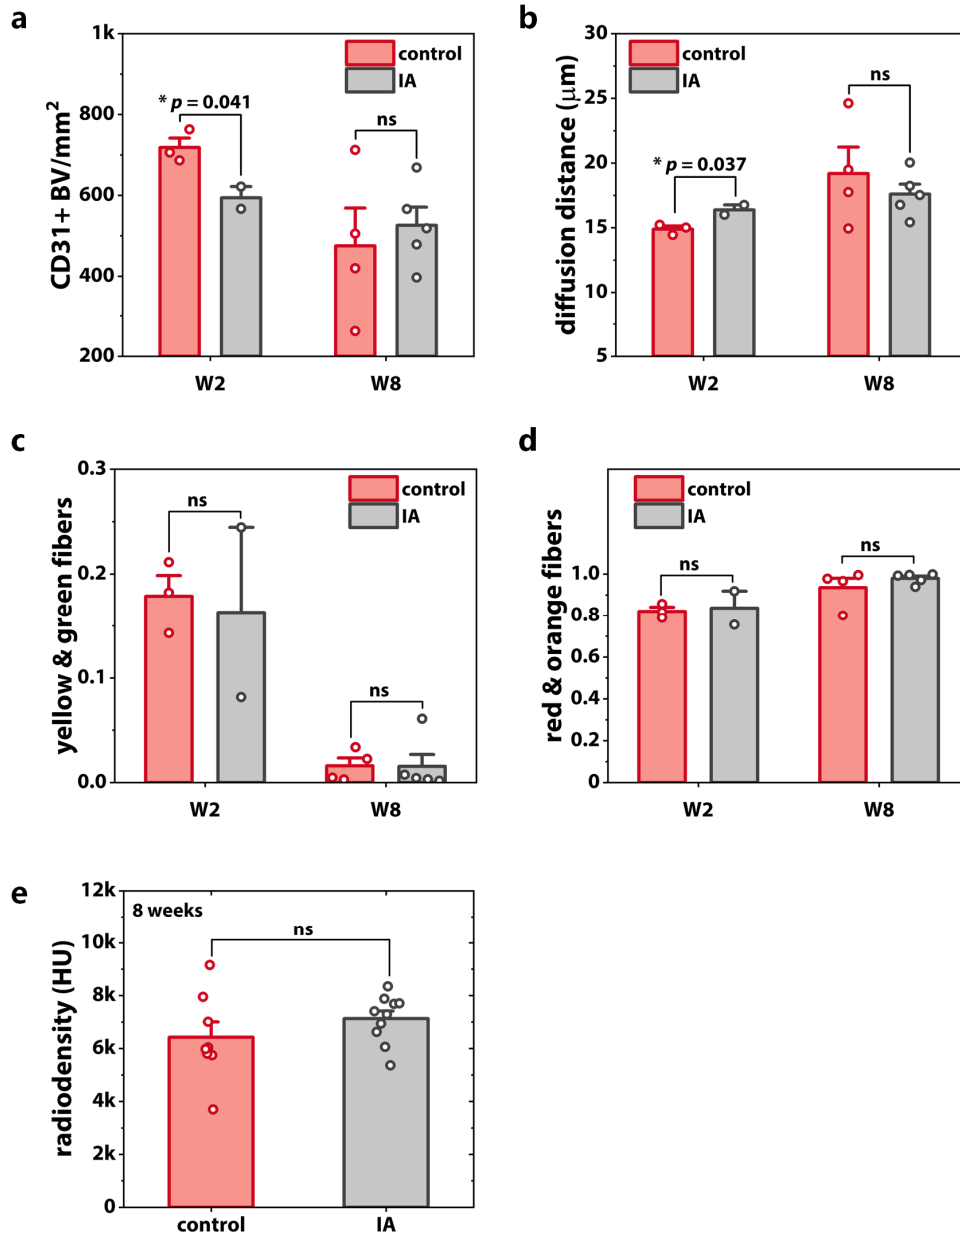

**Supplementary Fig. 7** | **a**, Number of CD31+ blood vessels per mm<sup>2</sup> in control and IA groups at 2 and 8 weeks. **b**, Radial diffusion distance in control and IA groups at 2 and 8 weeks. **c**, **d**, Relative integrated density of immature (**c**) and mature (**d**) collagen fibers in capsule obtained using polarized light microscopy after picrosirius red staining. Orange/red = mature collagen, yellow/green = immature collagen. **e**, Fibrous capsule density expressed as radiodensity (Hounsfield units) in control and IA groups at 2 and 8 weeks. Data are means  $\pm$  standard error of mean.  $n = 2-5$  mice per group. No technical replicates in **a-d**; 2 technical replicates per mouse (one per chamber) in **e**.  $p$ -values are calculated from unpaired, two-tailed, two-sample  $t$ -tests. See Supplementary Note 1 for detailed statistical analyses.



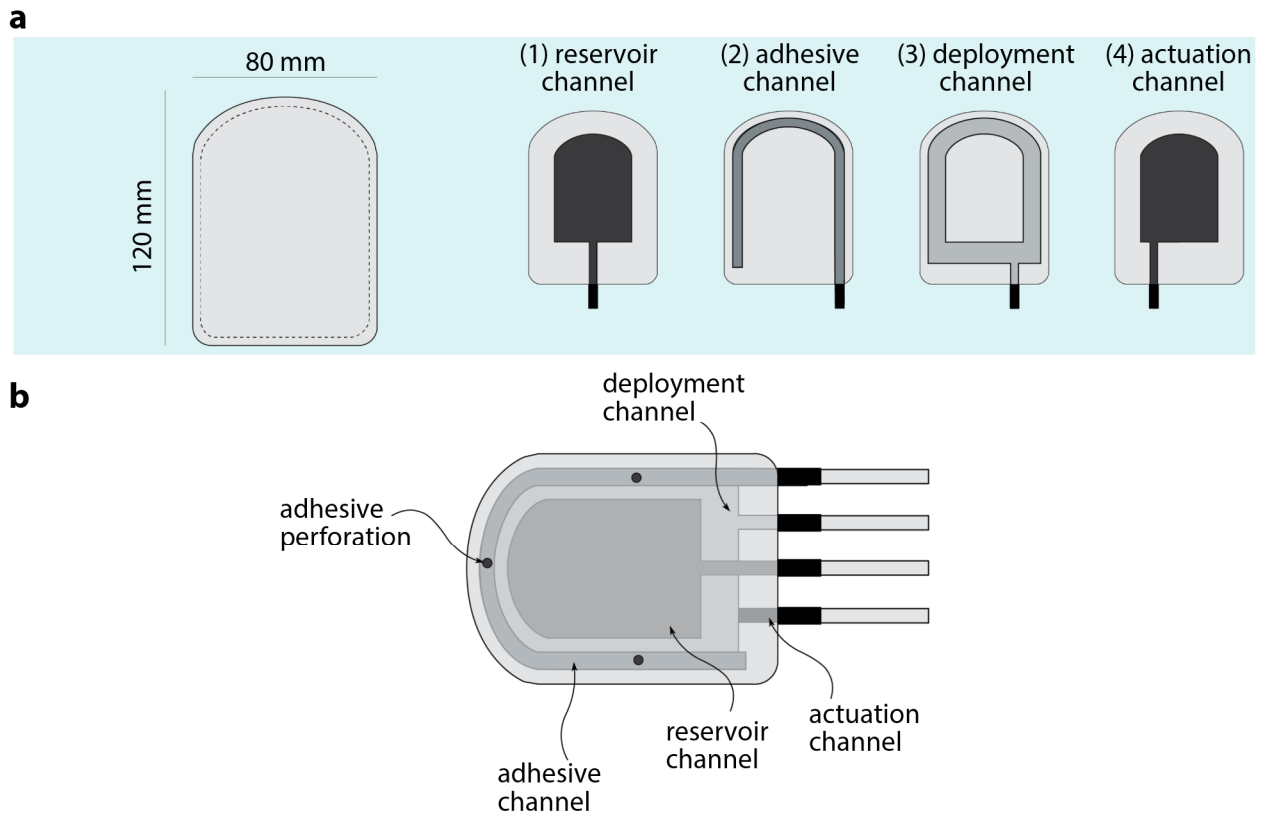

**Supplementary Fig. 8 | Schematic of device for human cadaveric model. a,** Schematics showing the layers of the scaled-up STAR device designed for minimally invasive clinical translation. **b,** Assembled device.

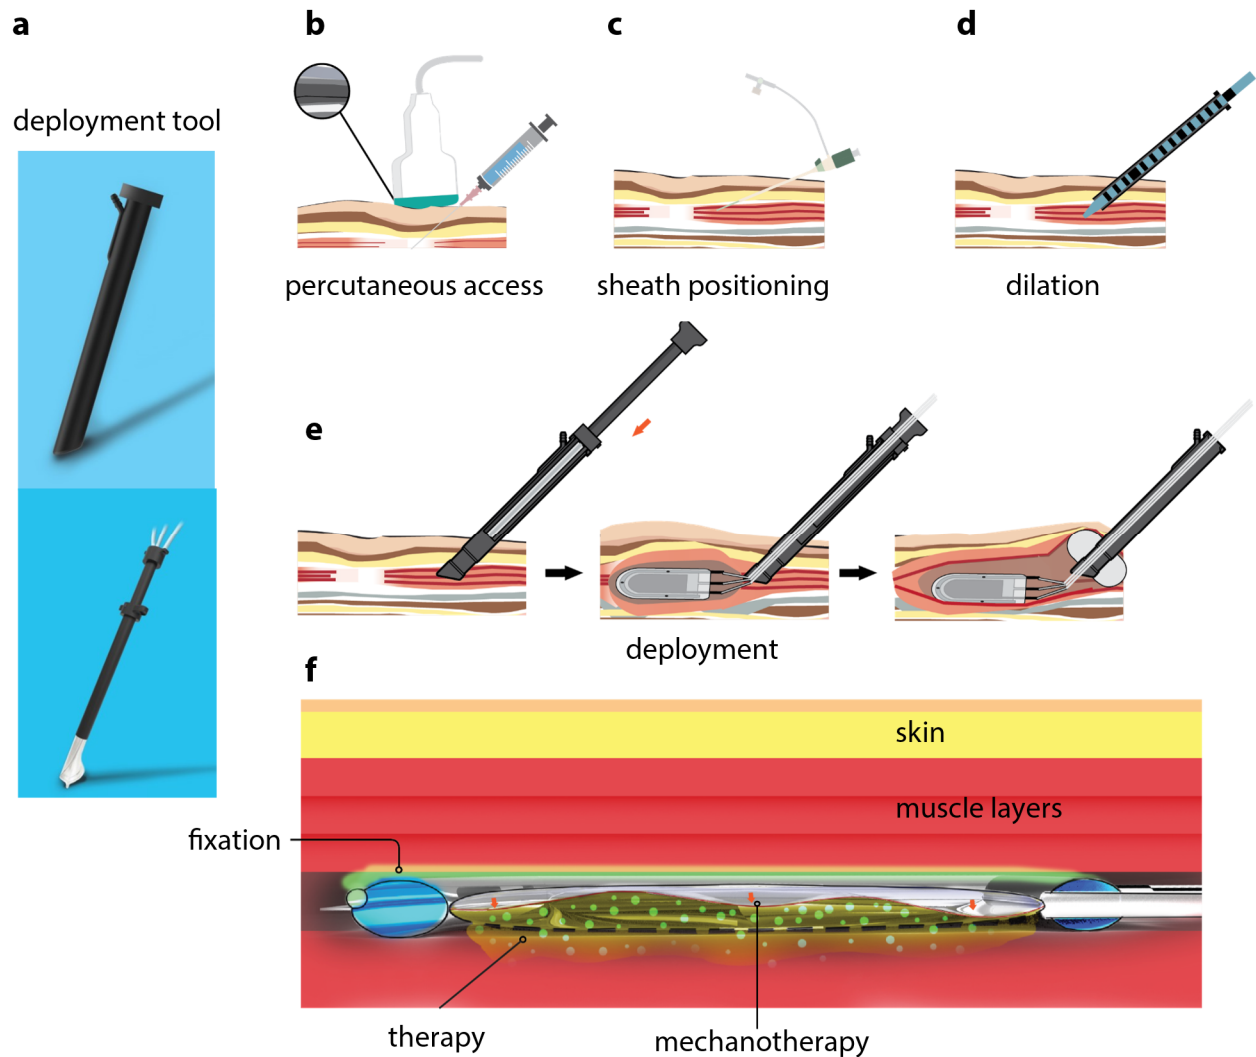

**Supplementary Fig. 9 | Schematic for minimally invasive surgical implantation of human scale STAR device.** **a**, CAD model of deployment tool. Top: Inflation sheath with side port for hand or CO<sub>2</sub> insufflation bulb. Bottom: Deployment plunger showing device in sheath and partially deployed with plunger. **b**, Ultrasound guidance is used to obtain needle access to the desired tissue plane and hydrodissection is performed to generate a potential space. **c**, A Seldinger technique is used to exchange the needle over a wire, and fluoroscopy is used to verify wire position in the tissue place. **d**, A commercially available dilator set is used to expand the space. **e**, Expanded space accommodates positioning of the deployment sheath. The deployment sheath is capped, and gas is used to pressurize the potential space while the deployment channel is filled with radiopaque contrast to enable opening of the device under fluoroscopic visualization. **f**, To secure the device in position, the adhesive channel is infused with a bioadhesive to fix the device to underlying tissue. Mechanical or biological therapy can then be delivered by the STAR device as required.

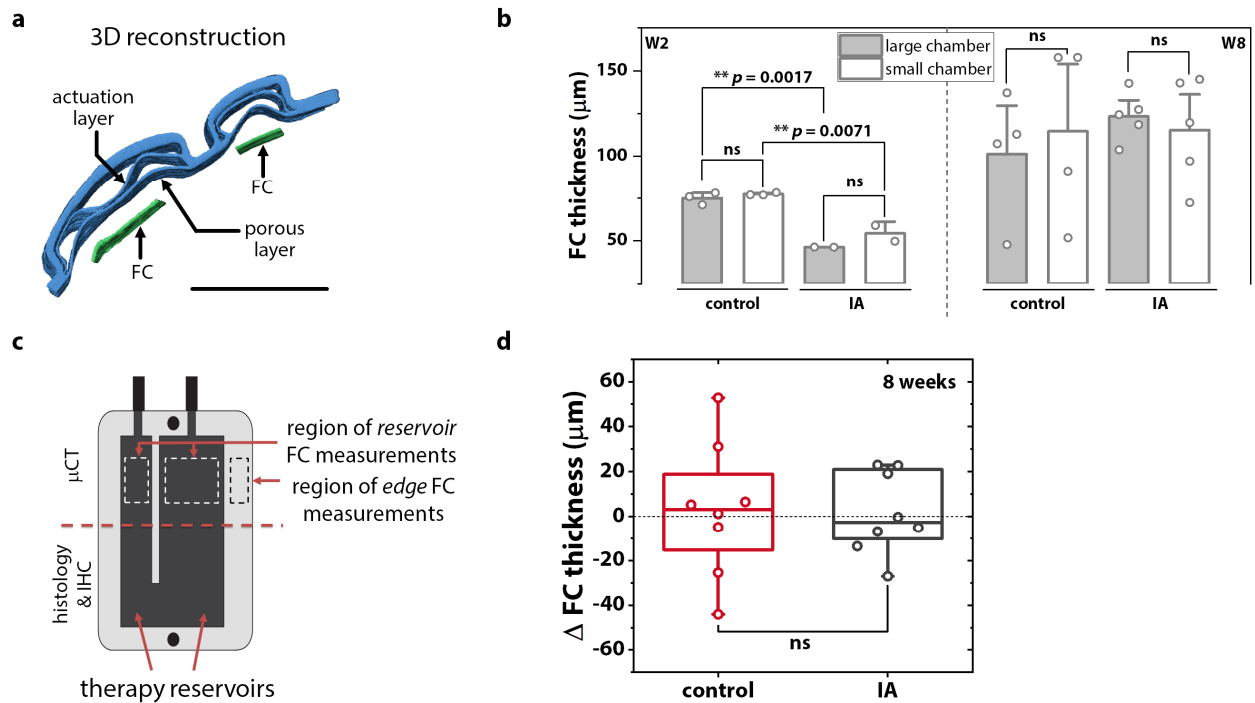

**Supplementary Fig. 10 | Fibrous capsule thickness analysis using  $\mu$ CT.** **a**, 3D reconstruction of STAR by  $\mu$ CT in the transverse plane, demonstrating small (3 mm) and large (6 mm) chambers of the device with fibrous encapsulation. Scale bar is 5 mm. **b**, Comparison of capsule thickness in large and small chambers at 2 weeks and 8 weeks.  $n = 2-5$  with no technical replicates. Data are means  $\pm$  standard error of mean.  $p$ -values are calculated from unpaired, one-tailed, two-sample  $t$ -tests. See Supplementary Note 1 for detailed statistical analyses. **c**, Schematic showing the STAR device with bi-chambered design. Dashed boxes denote areas of FC measurement underneath the 6 mm large and 3 mm small chambers (white) and at reservoir edge (black). **d**, Box and whiskers plot showing difference in mean FC Thickness adjacent to reservoir and edge regions of STAR (difference = reservoir – edge) measured at 8 weeks with  $n = 4$  mice per group and one thickness measurement per chamber (i.e., 2 technical replicates). Box represents the inter-quartile range (25 – 75 percentile) and whiskers represent the minima and maxima. The middle horizontal line inside a box represents the median.

## Supplementary Note 1 | Statistical Comparisons of Preclinical Data

### Figure 3b.

Metric: AUC at Day 3 (% × min)

| group   | time of measurement | <i>n</i> | mean    | standard error of mean |
|---------|---------------------|----------|---------|------------------------|
| control | day 3               | 3        | 6805.99 | 261.78                 |
| IA      | day 3               | 2        | 7626.03 | 704.16                 |

#### Statistical comparisons

| compared groups                    | <i>p</i> -value | is significant |
|------------------------------------|-----------------|----------------|
| at day 3 (baseline): control vs IA | 0.2193          | no**           |

\*\* Given no significant difference in insulin response between IA and control groups at day 3, we combined these data into one baseline group, which was used for all following comparisons. These five animals are plotted together in Figure 3c–f.

### Figure 3c.

Metric: max. BG drop (%)

| group   | time of measurement | <i>n</i> | mean   | standard error of mean |
|---------|---------------------|----------|--------|------------------------|
| BL      | day 3               | 5        | -72.45 | 2.22                   |
| 8W IA   | week 8              | 5        | -68.31 | 3.38                   |
| 3W IA   | week 8              | 5        | -40.06 | 7.86                   |
| control | week 8              | 4        | -20.95 | 4.31                   |

#### Statistical comparisons

Total number of comparisons =  $m$

- $m = 1$  for the first three rows below of within group comparisons,
- $m = 3$  for the last 3 rows of between group comparisons

Significance threshold at 95% confidence level =  $0.05/m$

| compared groups/timepoints               | <i>p</i> -value | $\alpha/m$ | is significant |
|------------------------------------------|-----------------|------------|----------------|
| within 8W IA group: BL vs 8 weeks        | 0.16757         | 0.05       | no             |
| within 3W IA group: BL vs 8 weeks        | 0.00207         | 0.05       | yes            |
| within control group: BL vs 8 weeks      | 0.00047         | 0.05       | yes            |
| at 8 weeks: 3W IA group vs control group | 0.04450         | 0.017      | no             |
| at 8 weeks: 8W IA group vs 3W IA group   | 0.00541         | 0.017      | yes            |
| at 8 weeks: 8W IA group vs control group | 0.00002         | 0.017      | yes            |

**Figure 3d.**

Metric: Time to 30% blood glucose drop (min)

| <b>group</b> | <b>time of measurement</b> | <b><i>n</i></b> | <b>mean</b> | <b>standard error of mean</b> |
|--------------|----------------------------|-----------------|-------------|-------------------------------|
| BL           | day 3                      | 5               | 10.89       | 1.80                          |
| IA           | week 2                     | 10              | 15.42       | 1.05                          |
| control      | week 2                     | 6               | 41.65       | 11.82                         |
| IA           | week 3                     | 10              | 21.32       | 1.23                          |
| control      | week 3                     | 6               | 48.95       | 10.98                         |
| 8W IA        | week 4                     | 5               | 27.43       | 4.48                          |
| 3W IA        | week 4                     | 5               | 38.06       | 9.01                          |
| control      | week 4                     | 6               | 73.55       | 14.85                         |
| 8W IA        | week 5                     | 5               | 27.19       | 3.71                          |
| 3W IA        | week 5                     | 5               | 32.69       | 4.46                          |
| control      | week 5                     | 5               | 77.34       | 18.69                         |
| 8W IA        | week 8                     | 5               | 26.33       | 6.16                          |
| 3W IA        | week 8                     | 5               | 65.76       | 22.24                         |
| control      | week 8                     | 4               | >120        | –                             |

**Figure 3f.**

Metric: AUC at various timepoints (% × min)

| <b>group</b> | <b>time of measurement</b> | <b><i>n</i></b> | <b>mean</b> | <b>standard error of mean</b> |
|--------------|----------------------------|-----------------|-------------|-------------------------------|
| IA           | week 2                     | 10              | 6492.05     | 319.91                        |
| control      | week 2                     | 6               | 4937.95     | 786.06                        |
| IA           | week 3                     | 10              | 5785.99     | 303.27                        |
| control      | week 3                     | 6               | 4054.31     | 364.21                        |
| 8W IA        | week 4                     | 5               | 4615.08     | 533.96                        |
| 3W IA        | week 4                     | 5               | 4177.47     | 452.79                        |
| control      | week 4                     | 6               | 2542.72     | 537.93                        |
| 8W IA        | week 5                     | 5               | 4873.69     | 531.36                        |
| 3W IA        | week 5                     | 5               | 3593.95     | 639.45                        |
| control      | week 5                     | 5               | 2155.62     | 578.70                        |
| 8W IA        | week 8                     | 5               | 5802.30     | 522.71                        |
| 3W IA        | week 8                     | 5               | 2892.71     | 796.39                        |

|         |        |   |        |        |
|---------|--------|---|--------|--------|
| control | week 8 | 4 | 971.82 | 424.36 |
|---------|--------|---|--------|--------|

### Statistical comparisons

Total number of comparisons =  $m$

- $m = 1$  for weeks 2 and 3 (single 2-group comparison at each timepoint).
- $m = 3$  for weeks 4–8 (3 comparisons between 3 groups at each timepoint).

Significance threshold at 95% confidence level =  $0.05/m$

| compared groups             | $p$ -value | $\alpha/m$ | is significant |
|-----------------------------|------------|------------|----------------|
| at week 2: control vs IA    | 0.0253     | 0.05       | yes            |
| at week 3: control vs IA    | 0.0015     | 0.05       | yes            |
| at week 4: control vs 8W IA | 0.01205    | 0.017      | yes            |
| at week 4: control vs 3W IA | 0.02487    | 0.017      | no             |
| at week 4: 3W IA vs 8W IA   | 0.27467    | 0.017      | no             |
| at week 5: control vs 8W IA | 0.00429    | 0.017      | yes            |
| at week 5: control vs 3W IA | 0.07965    | 0.017      | no             |
| at week 5: 3W IA vs 8W IA   | 0.06780    | 0.017      | no             |
| at week 8: control vs 8W IA | 0.00012    | 0.017      | yes            |
| at week 8: control vs 3W IA | 0.04499    | 0.017      | no             |
| at week 8: 3W IA vs 8W IA   | 0.00786    | 0.017      | yes            |

### Figure 4c.

Metric: Volume of Neutrophils ( $\text{mm}^3$ )

| group   | time of measurement | $n$ | mean    | standard error of mean |
|---------|---------------------|-----|---------|------------------------|
| control | day 3               | 3   | 0.26133 | 0.02831                |
| IA      | day 3               | 3   | 0.23767 | 0.01894                |
| control | day 5               | 3   | 0.34900 | 0.0589                 |
| IA      | day 5               | 3   | 0.12567 | 0.0067                 |

### Statistical comparisons

| compared groups         | $p$ -value | is significant |
|-------------------------|------------|----------------|
| at day 3: control vs IA | 0.2627     | no             |
| at day 5: control vs IA | 0.0098     | yes            |

**Figure 4e.**

Metric: Volume of Myofibroblasts (mm<sup>3</sup>)

| group   | time of measurement | <i>n</i> | mean    | standard error of mean |
|---------|---------------------|----------|---------|------------------------|
| control | week 2              | 3        | 0.03610 | 0.00229                |
| IA      | week 2              | 2        | 0.02185 | 0.00143                |

Statistical comparisons

| compared groups          | <i>p</i> -value | is significant |
|--------------------------|-----------------|----------------|
| at week 2: control vs IA | 0.0068          | yes            |

**Figure 4g.**

Metric: Cells per capsular area (%)

| group   | time of measurement | <i>n</i> | mean   | standard error of mean |
|---------|---------------------|----------|--------|------------------------|
| control | day 3               | 3        | 0.7203 | 0.0168                 |
| IA      | day 3               | 3        | 0.7957 | 0.1008                 |
| control | day 5               | 3        | 1.1907 | 0.2147                 |
| IA      | day 5               | 3        | 1.0265 | 0.1587                 |
| control | week 2              | 3        | 1.7592 | 0.3925                 |
| IA      | week 2              | 2        | 1.0426 | 0.0076                 |

Statistical comparisons

| compared groups          | <i>p</i> -value | is significant |
|--------------------------|-----------------|----------------|
| at day 3: control vs IA  | 0.7492          | no             |
| at day 5: control vs IA  | 0.2858          | no             |
| at week 2: control vs IA | 0.1261          | no             |

**Figure 4i.**

Metric: Fibrous capsule thickness (μm)

| group   | time of measurement | technical replicates* | <i>n</i> | mean    | standard error of mean |
|---------|---------------------|-----------------------|----------|---------|------------------------|
| control | day 3               | 2                     | 6        | 53.8588 | 3.9472                 |
| IA      | day 3               | 2                     | 6        | 53.3199 | 4.0821                 |
| control | day 5               | 2                     | 6        | 59.8096 | 7.1008                 |
| IA      | day 5               | 2                     | 6        | 50.9469 | 4.5207                 |

|         |        |   |    |          |         |
|---------|--------|---|----|----------|---------|
| control | week 2 | 2 | 6  | 76.2547  | 1.0824  |
| IA      | week 2 | 2 | 4  | 50.3887  | 2.9953  |
| control | week 8 | 2 | 8  | 107.9733 | 15.1640 |
| IA      | week 8 | 2 | 10 | 119.3827 | 7.2912  |

\* Technical replicates were two different measurements taken from fibrous capsule underlying each of the two chambers (large and small) for each device.

#### Statistical comparisons

| compared groups/timepoints            | <i>p</i> -value | is significant |
|---------------------------------------|-----------------|----------------|
| at day 3: control vs IA               | 0.4631          | no             |
| at day 5: control vs IA               | 0.1713          | no             |
| at week 2: control vs IA              | 0.000006293     | yes            |
| at week 8: control vs IA              | 0.7602          | no             |
| within control group: day 3 vs week 2 | 0.00013617      | yes            |
| within IA group: day 3 vs week 2      | 0.6164          | no             |

#### Figure 4k.

Metric: Collagen alignment by optical coherency (unitless)

| group   | time of measurement | technical replicates* | <i>n</i>         | mean   | standard error of mean |
|---------|---------------------|-----------------------|------------------|--------|------------------------|
| control | week 2              | 60                    | 180              | 0.2912 | 0.0088                 |
| IA      | week 2              | 60                    | 120              | 0.3072 | 0.0118                 |
| control | week 8              | 60                    | 240              | 0.3056 | 0.0071                 |
| IA      | week 8              | 60                    | 294 <sup>+</sup> | 0.3893 | 0.0075                 |

\*Technical replicates were 6 ROIs per slice with 10 slices taken per sample.

<sup>+</sup> One slice comprised of 6 ROIs was of poor image quality and therefore was excluded from this analysis.

#### Statistical comparisons

| compared groups/timepoints             | <i>p</i> -value | is significant |
|----------------------------------------|-----------------|----------------|
| at week 2: control vs IA               | 0.2720          | no             |
| at week 8: control vs IA               | 8.234E-15       | yes            |
| within control group: week 2 vs week 8 | 0.2027          | no             |
| within IA group: week 2 vs week 8      | 7.582E-9        | yes            |



**Supplementary Figure 7a.**Metric: Numerical density of blood vessels per unit area (N/mm<sup>2</sup>)

| group   | time of measurement | <i>n</i> | mean     | standard error of mean |
|---------|---------------------|----------|----------|------------------------|
| control | week 2              | 3        | 718.6643 | 23.0575                |
| IA      | week 2              | 2        | 594.1995 | 27.4345                |
| control | week 8              | 4        | 475.1421 | 93.7431                |
| IA      | week 8              | 5        | 525.8135 | 45.2984                |

Statistical comparisons

| compared groups          | <i>p</i> -value | is significant |
|--------------------------|-----------------|----------------|
| at week 2: control vs IA | 0.041           | yes            |
| at week 8: control vs IA | 0.6177          | no             |

**Supplementary Figure 7b.**

Metric: Diffusion distance (μm)

| group   | time of measurement | <i>n</i> | mean    | standard error of mean |
|---------|---------------------|----------|---------|------------------------|
| control | week 2              | 3        | 14.8913 | 0.2346                 |
| IA      | week 2              | 2        | 16.3804 | 0.3796                 |
| control | week 8              | 4        | 19.1932 | 2.0328                 |
| IA      | week 8              | 5        | 17.5946 | 0.7657                 |

Statistical comparisons

| compared groups          | <i>p</i> -value | is significant |
|--------------------------|-----------------|----------------|
| at week 2: control vs IA | 0.037           | yes            |
| at week 8: control vs IA | 0.4472          | no             |

**Supplementary Figure 7c.**

Metric: Relative integrated density of yellow &amp; green immature collagen fibres (unitless)

| group   | time of measurement | <i>n</i> | mean   | standard error of mean |
|---------|---------------------|----------|--------|------------------------|
| control | week 2              | 3        | 0.1788 | 0.0197                 |
| IA      | week 2              | 2        | 0.1631 | 0.0814                 |
| control | week 8              | 4        | 0.0160 | 0.0074                 |
| IA      | week 8              | 5        | 0.0155 | 0.0114                 |

Statistical comparisons

| <b>compared groups</b>   | <b><i>p</i>-value</b> | <b>is significant</b> |
|--------------------------|-----------------------|-----------------------|
| at week 2: control vs IA | 0.8265                | no                    |
| at week 8: control vs IA | 0.9739                | no                    |

**Supplementary Figure 7d.**

Metric: Relative integrated density of red & orange mature collagen fibres (unitless)

| <b>group</b> | <b>time of measurement</b> | <b><i>n</i></b> | <b>mean</b> | <b>standard error of mean</b> |
|--------------|----------------------------|-----------------|-------------|-------------------------------|
| control      | week 2                     | 3               | 0.8211      | 0.0197                        |
| IA           | week 2                     | 2               | 0.8369      | 0.0814                        |
| control      | week 8                     | 4               | 0.9349      | 0.0453                        |
| IA           | week 8                     | 5               | 0.9793      | 0.0111                        |

Statistical comparisons

| <b>compared groups</b>   | <b><i>p</i>-value</b> | <b>is significant</b> |
|--------------------------|-----------------------|-----------------------|
| at week 2: control vs IA | 0.8261                | no                    |
| at week 8: control vs IA | 0.3218                | no                    |

**Supplementary Figure 7e.**

Metric: Radiodensity of fibrous capsule (Hounsfield units)

| <b>group</b> | <b>time of measurement</b> | <b>technical replicates*</b> | <b><i>n</i></b> | <b>mean</b> | <b>standard error of mean</b> |
|--------------|----------------------------|------------------------------|-----------------|-------------|-------------------------------|
| control      | week 8                     | 2                            | 8               | 6423.65     | 578.78                        |
| IA           | week 8                     | 2                            | 10              | 7130.87     | 285.65                        |

\* Technical replicates were two different measurements taken from fibrous capsule underlying each of the two chambers (large and small) for each device.

Statistical comparisons

| <b>compared groups</b>   | <b><i>p</i>-value</b> | <b>is significant</b> |
|--------------------------|-----------------------|-----------------------|
| at week 8: control vs IA | 0.2602                | no                    |

**Supplementary Figure 10b.**

Metric: Fibrous capsule thickness underlying large and small chambers ( $\mu\text{m}$ )

| <b>group</b> | <b>chamber</b> | <b>time of measurement</b> | <b><i>n</i></b> | <b>mean</b> | <b>standard error of mean</b> |
|--------------|----------------|----------------------------|-----------------|-------------|-------------------------------|
|--------------|----------------|----------------------------|-----------------|-------------|-------------------------------|

|         |       |        |   |          |         |
|---------|-------|--------|---|----------|---------|
| control | large | week 2 | 3 | 75.0661  | 2.0597  |
| control | small | week 2 | 3 | 77.4433  | 0.4499  |
| IA      | large | week 2 | 2 | 46.3545  | 0.0275  |
| IA      | small | week 2 | 2 | 54.4230  | 4.619   |
| control | large | week 8 | 4 | 101.2995 | 18.9527 |
| control | small | week 8 | 4 | 114.6471 | 26.1571 |
| IA      | large | week 8 | 5 | 123.3375 | 6.3065  |
| IA      | small | week 8 | 5 | 115.4279 | 13.8433 |

#### Statistical comparisons

| <b>compared groups/timepoints</b>                         | <b><i>p</i>-value</b> | <b>is significant</b> |
|-----------------------------------------------------------|-----------------------|-----------------------|
| at week 2 within control group: large vs small            | 0.3226                | no                    |
| at week 2 within IA group: large vs small                 | 0.2224                | no                    |
| at week 8 within control group: large vs small            | 0.6938                | no                    |
| at week 8 within IA group: large vs small                 | 0.6172                | no                    |
| at week 2 within large chamber: control group vs IA group | 0.0017                | yes                   |
| at week 2 within small chamber: control group vs IA group | 0.0071                | yes                   |

#### **Supplementary Figure 10d.**

Metric: Difference in FC thickness between reservoir and edge ( $\mu\text{m}$ )

| <b>group</b> | <b>time of measurement</b> | <b>technical replicates*</b> | <b><i>n</i></b> | <b>mean</b> | <b>standard error of mean</b> |
|--------------|----------------------------|------------------------------|-----------------|-------------|-------------------------------|
| control      | week 8                     | 2                            | 8               | 2.8059      | 10.6681                       |
| IA           | week 8                     | 2                            | 8               | 1.4898      | 6.5132                        |

\* Technical replicates were two different measurements taken from fibrous capsule underlying each of the two chambers (large and small) for each device.

#### Statistical comparisons

| <b>compared groups</b>   | <b><i>p</i>-value</b> | <b>is significant</b> |
|--------------------------|-----------------------|-----------------------|
| at week 8: control vs IA | 0.9176                | no                    |
